# Supplementary material
Source: PubMed Central journal article supplement (PMC7094693)
Supplement: mmc1.pdf [file mmc1.pdf]

# Supplemental Information: *Peptide entry inhibitors of enveloped viruses: The importance of interfacial hydrophobicity.*

*H. Badani, RF Garry, WC Wimley*

## Using MPEX: Membrane Protein Explorer

from the Stephen White laboratory at UC Irvine

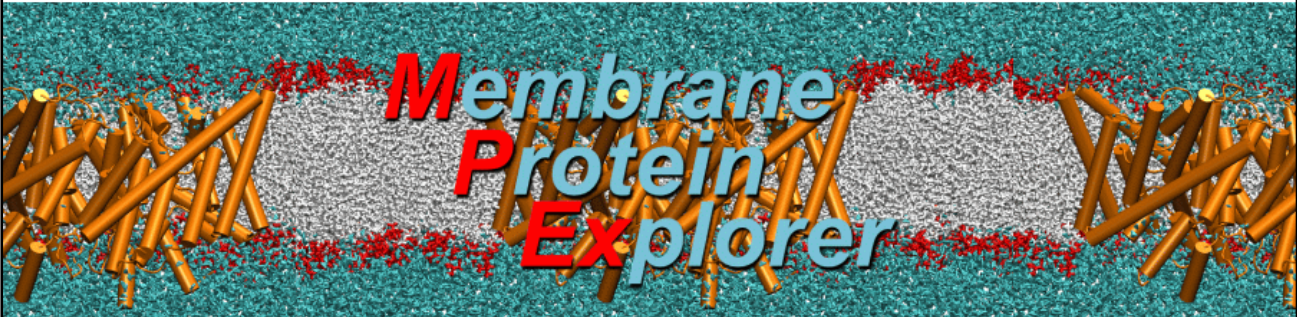

Home News Resources Publications Tools People

**MPEX 3.2, with complete documentation, is now available!**  
Send Suggestions to [Craig Snider](#).

---

**W**elcome to **Membrane Protein Explorer (MPEX)**, a tool for exploring the topology and other features of membrane proteins by means of hydropathy plots based upon thermodynamic and biological principles. For instructions, see [Features at a Glance](#) and [Brief Instructions for MPEX](#) below, or the [full documentation](#). Current version: 3.2. A useful adjunct to MPEX is [MPtopo](#), a database of Membrane Protein topology accessible from MPEX.



MPEX is a Java program (*not a Java applet*) deployed using Java Web Start, which is part of the Java Runtime Environment (JRE). There has been recent concern over Java security vulnerabilities. These concerns are being addressed by [Oracle](#), the provider of Java, but apply to Java applets running within web browsers and, as far as we can determine, do not apply to programs like MPEX. MPEX is a Java Web Start program that does not run within a web browser. Furthermore, *MPEX is signed by a*

We encourage all MPEX users to use the version associated with the 'Start' button above. That version uses Java 7.

1) Navigate your browser to: <http://blanco.biomol.uci.edu/mpex/>

2) Click “Start MPEX”. A java program (certified to be safe) will be deployed on your computer. Note its location or make a shortcut to it and you can run it from there in the future without needing an internet connection. You must have java installed to run MPEX.

# Using MPE<sub>x</sub>: Membrane Protein Explorer: *Protein Profile*

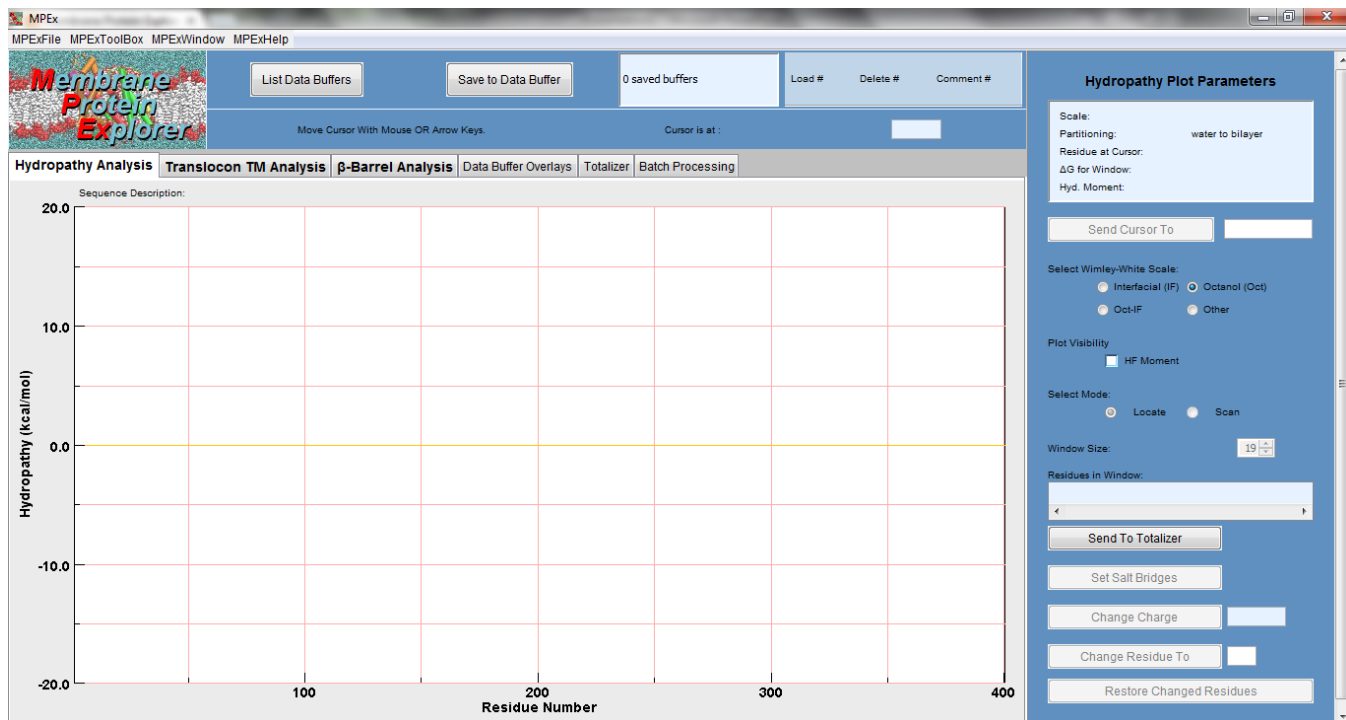

3) Launch the MPE<sub>x</sub> Program

# Using MPEX: Membrane Protein Explorer: *Protein Profile*

- 4) To obtain the whole protein sliding window Wimley-White Interfacial Hydrophobicity Scale (WWIHS) profile
  - a) Enter the protein sequence: Click MPEXFile> Enter Sequence
  - b) Paste the FASTA sequence into the Window. Use CNTL-V in windows as right-click is not active.

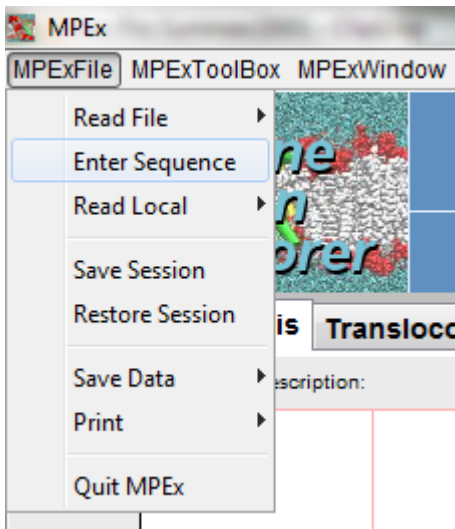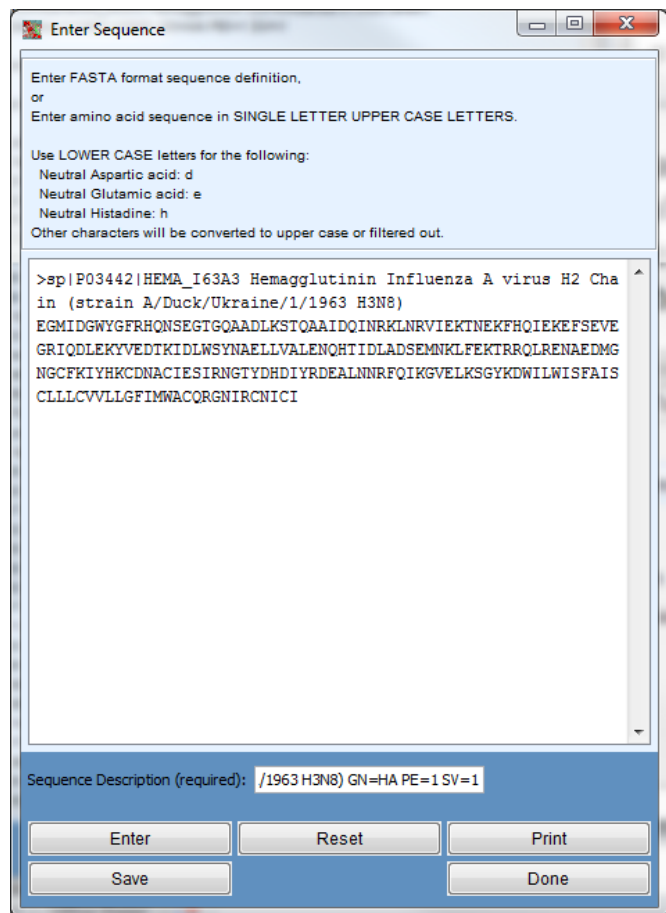

- c) Click "Enter" or "Done"

# Using MPEx: Membrane Protein Explorer: *Protein Profile*

d) Click hydropathy analysis tab to see the results

e) At the right click “Interfacial (IF)” button for WWIHS

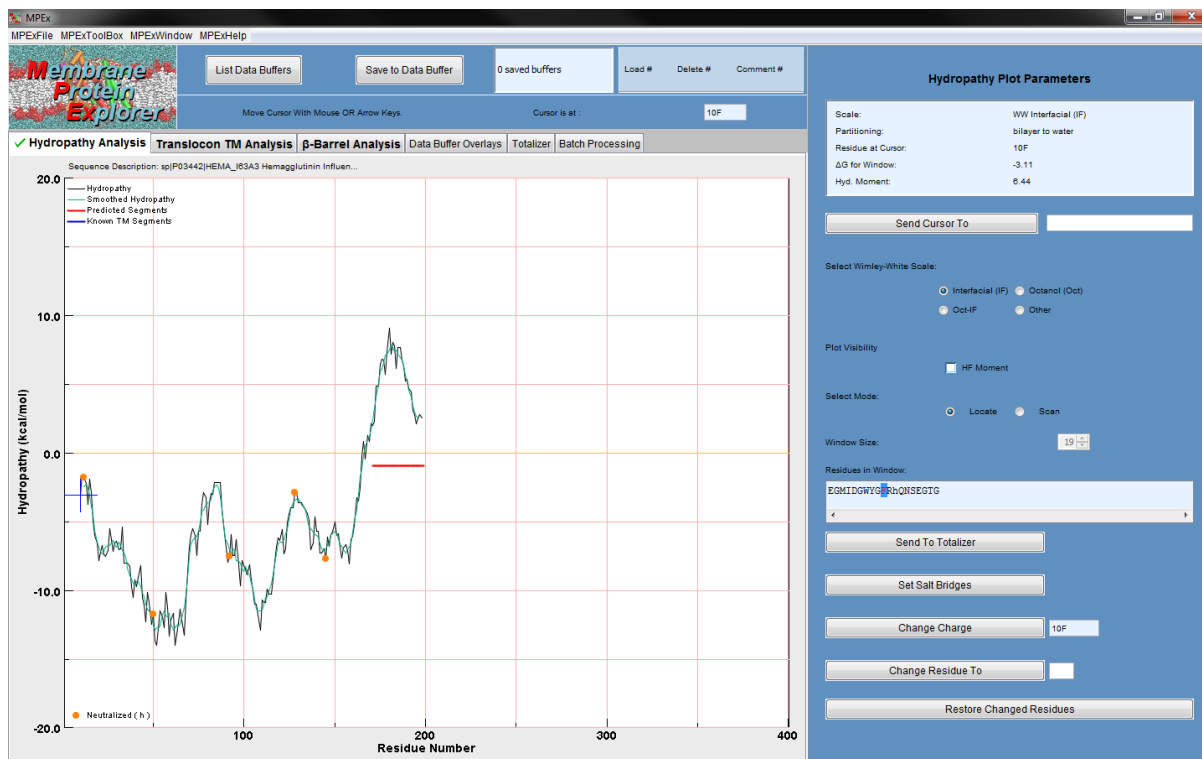

e) For low pH results, click MPExToolBox> Set Glu,Asp,His states

f) Set Glu and Asp to neutral (checked). Set His to charged (unchecked)

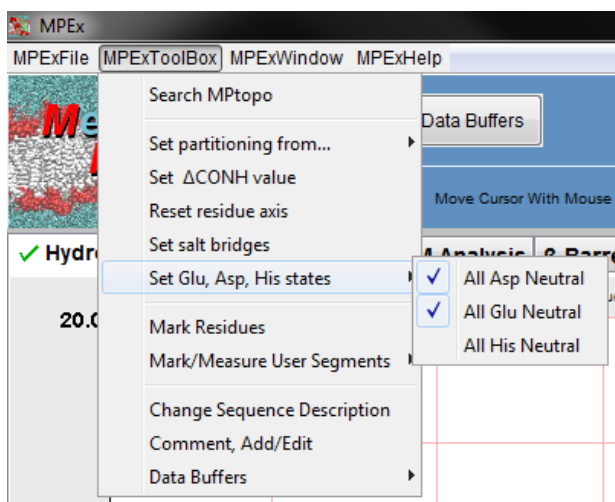

# Using MPEx: Membrane Protein Explorer: *Protein Profile*

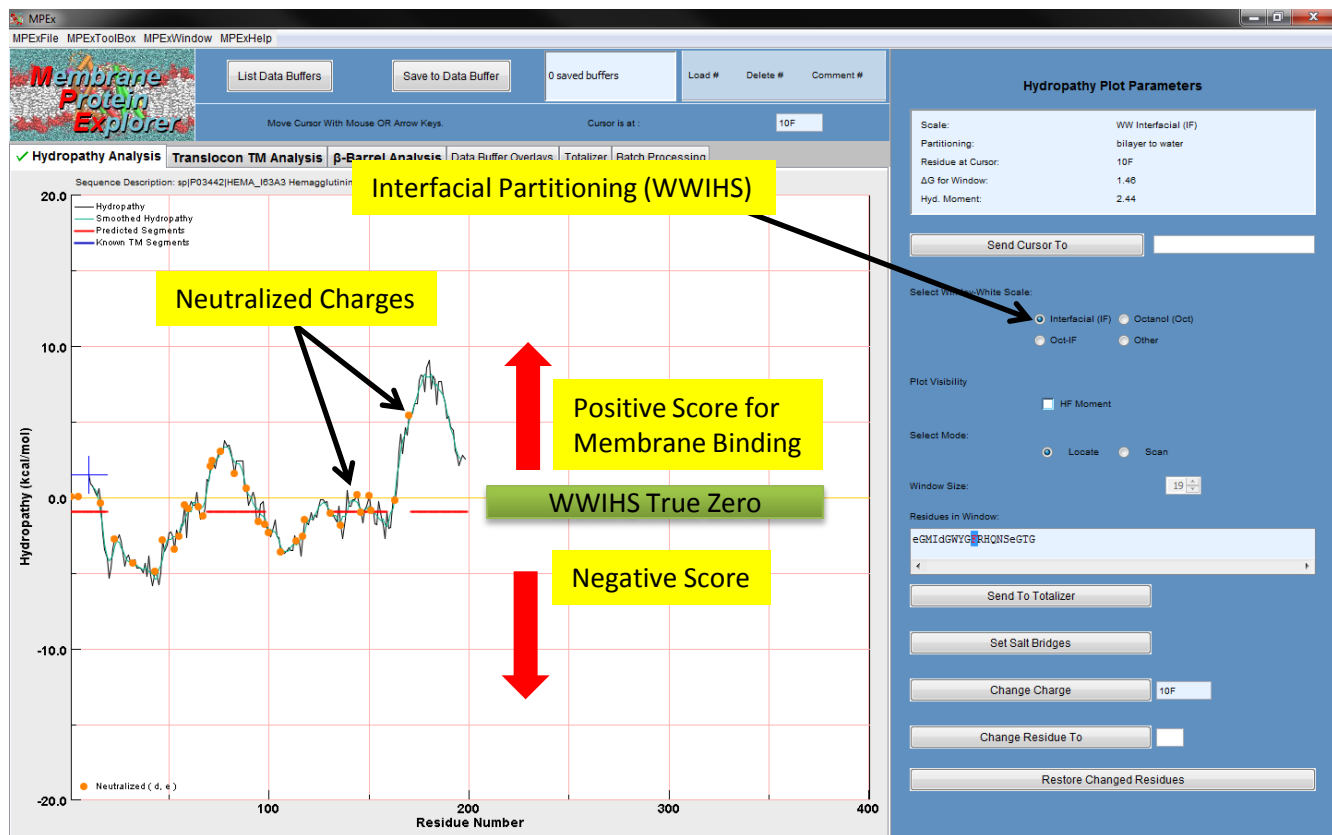

f) Segments above zero indicate a propensity to interact with membrane interfaces

g) Neutralized Glu and Asp are indicated by dots

# Using MPEx: Membrane Protein Explorer: *Protein Profile*

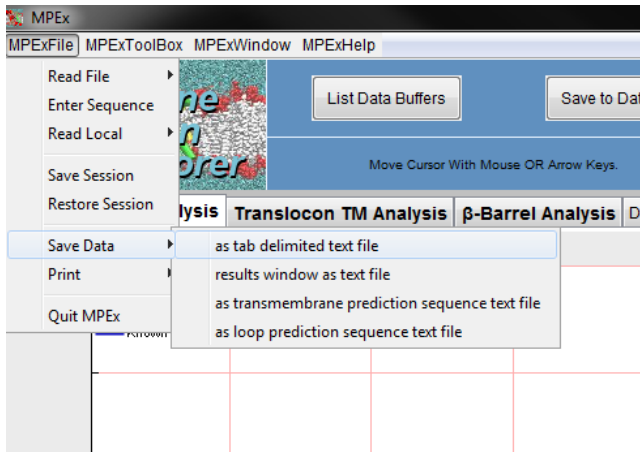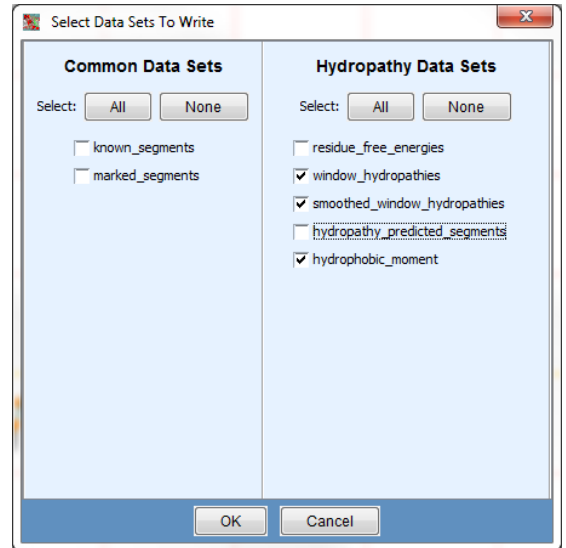

h) To save profile as a text file for analysis and plotting:  
Click MPExFile>Save Data> as tab delimited text file.

i) Select “Window\_hydropathies”. Optional data sets:  
“Smoothed\_Window\_hydropathies” and “Hydrophobic\_moment”

## Using MPEx: Membrane Protein Explorer: *Protein Profile*

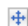

| Position | Residue | WWIHS score | WWIHS score smoothed | Helical hydrophobic moment |
|----------|---------|-------------|----------------------|----------------------------|
| 75       | R       | -0.58       | -0.368               | 3.365                      |
| 76       | I       | -0.52       | -0.344               | 3.304                      |
| 77       | Q       | 0.33        | -0.586               | 2.344                      |
| 78       | d       | -0.67       | -0.728               | 1.895                      |
| 79       | L       | -1.49       | -0.772               | 1.702                      |
| 80       | e       | -1.29       | -0.602               | 1.65                       |
| 81       | K       | -0.74       | -0.26                | 1.986                      |
| 82       | Y       | 1.18        | 0.436                | 1.209                      |
| 83       | V       | 1.04        | 1.17                 | 1.337                      |
| 84       | e       | 1.99        | 1.698                | 1.765                      |
| 85       | d       | 2.38        | 1.96                 | 2.256                      |
| 86       | T       | 1.9         | 2.348                | 2.375                      |
| 87       | K       | 2.49        | 2.546                | 1.8                        |
| 88       | I       | 2.98        | 2.65                 | 2.305                      |
| 89       | d       | 2.98        | 3.014                | 1.542                      |
| 90       | L       | 2.9         | 3.184                | 1.608                      |
| 91       | W       | 3.72        | 3.272                | 0.679                      |
| 92       | s       | 3.34        | 3.274                | 0.991                      |
| 93       | Y       | 3.42        | 3.162                | 1.059                      |
| 94       | N       | 2.99        | 2.722                | 1.478                      |
| 95       | A       | 2.34        | 2.528                | 1.526                      |
| 96       | e       | 1.52        | 2.318                | 0.567                      |
| 97       | L       | 2.37        | 2.194                | 1.586                      |
| 98       | L       | 2.37        | 2.2                  | 1.502                      |
| 99       | V       | 2.37        | 1.966                | 1.608                      |
| 100      | A       | 2.37        | 1.602                | 1.57                       |
| 101      | L       | 0.35        | 1.024                | 1.242                      |
| 102      | e       | 0.55        | 0.532                | 1.196                      |
| 103      | N       | -0.52       | 0.12                 | 0.593                      |
| 104      | Q       | -0.09       | 0.026                | 1.003                      |
| 105      | H       | 0.31        | -0.418               | 0.75                       |

j) These data can be used to identify WWIHS positive segments.

k) lower case E,D,H,K,R indicates that the residue is uncharged.

# Using MPEx: Membrane Protein Explorer: *Protein Profile*

## Influenza Hemagglutinin H3 HA2 Chain

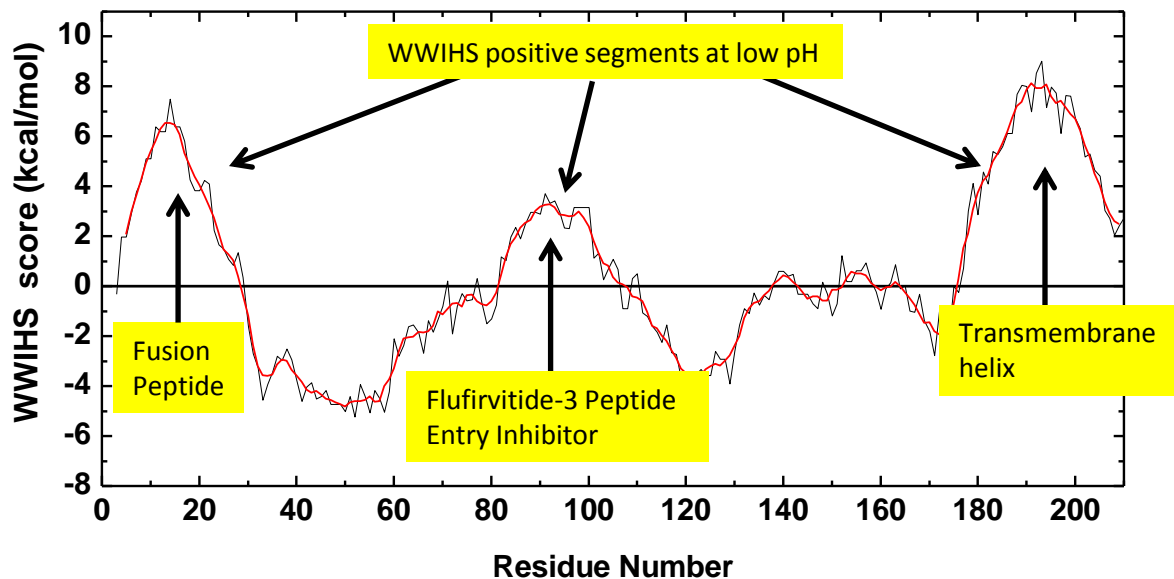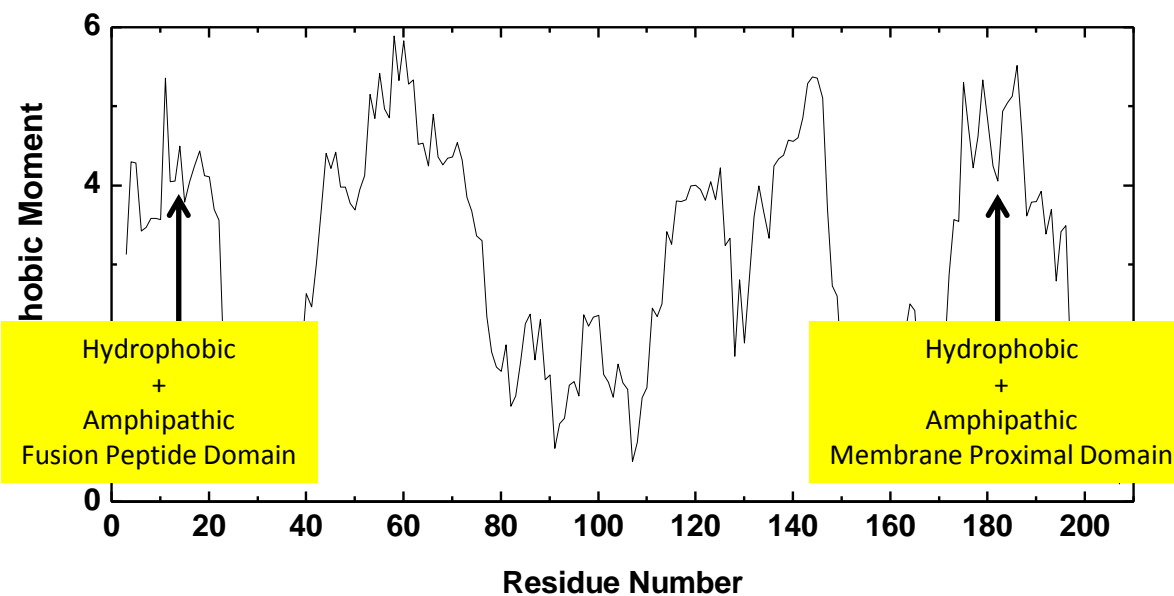



# Using MPEX: Membrane Protein Explorer: *Peptide Analysis*

## Analysis of individual peptides is done in Totalizer mode

**Totalizer**

**Interfacial Partitioning (WWIHS)**

**Set end groups to typical  $\text{NH}_3^+$  and  $\text{CONH}_2$**

**From bilayer to water so that favorable partitioning is positive**

5) To obtain the Wimley-White Interfacial Hydrophobicity Scale score for a peptide sequence

- Launch MPEX, Click “totalizer” tab.
- Click “Interfacial (IF) for WWIHS”
- Set end groups. Typical:  $\text{NH}_3^+$  and  $\text{CONH}_2$
- Set partitioning from bilayer to water (interacting sequences will have positive scores).

# Using MPEx: Membrane Protein Explorer: *Peptide Analysis*

The screenshot displays the MPEx software interface. On the left, a circular diagram represents a membrane protein with various residues labeled (e.g., S10, d3, e14, d7, Y11, T4, L15, L8, Y1, V1, N2, K5, L16, W9, e2, A13). A yellow box labeled "Direction Of iHMM" has an arrow pointing to the diagram. Below the diagram is a legend for residue types: Neutralized (orange), Acidic (red), Basic (green), Aliphatic (blue), Polar (yellow), and Aromatic (purple). The "Sequence:" field contains "VedTKIdLWSYNaeLL".

In the center, the "Input Sequence Below:" field contains "VedTKIdLWSYNaeLL" with an arrow pointing to it from a yellow box labeled "Sequence". Below this field is a legend for sequence characters: Neutral Aspartic acid: d, Neutral Glutamic acid: e, Neutral Histidine: h, and other characters will be filtered out.

On the right, the "Totalizer Parameters" panel shows the following results:

| Parameter                | Value            |
|--------------------------|------------------|
| Sequence Length:         | 16               |
| Partitioning:            | bilayer to water |
| $\Delta G$ :             | 5.19             |
| Subsequence $\Delta G$ : | 5.19             |
| Total Hyd. Moment:       | 0.33             |
| Subseq. Hyd. Moment:     | 0.33             |

Below the parameters, the "Select Wimley-White Scale:" section has "Interfacial (IF)" selected. The "End Groups:" section has "N-T NH3+", "N-T NH2", "N-T Acetylated", and "C-T COO-", "C-T COOH", "C-T CONH2" options. The "Partitioning:" section has "From Water To Bilayer" selected.

- Enter sequence, or insert with CNTL-V. Capital D,E,H,K,R are charged. Lower case letters signify uncharged residues
- For low pH peptide membrane interaction use lower case **d** and **e** and upper case H,K and R

Totalizer Results:

The WWIHS score is " $\Delta G$ ". Positive is favorable.

The interfacial Helical Hydrophobic Moment (iHMM) is

"Total Hydrophobic Moment". iHMM is always positive, but larger is more favorable.
